# Supplementary material for: Evidence for X-Chromosomal Schizophrenia Associated with microRNA Alterations
Source: PLoS One. 2009 Jul 1;4(7):e6121. doi: 10.1371/journal.pone.0006121 (PMC2699475; doi:10.1371/journal.pone.0006121)
Supplement: Table S3 — (0.05 MB XLS) [file pone.0006121.s003.xls]

## Sheet: Oligos
Table S3. Primers used to clone pri-miRNA and probes for northern blots
hsa-let-7f-2
5xho-let7f2	attatCTCGAGaatctctcaggtaactctcc
3BamH-let7f2	attatGGATCCAGAGTTGCAGTCAGGAAATG
5x-Let7f2-si	TCGAAACTATACAATCTACTACCTCA
3s-Let7f2-si	CTAGTGAGGTAGTAGATTGTATAGTT
5x-Let7f2-m-si	TCGAAACTATACAATTTACTACCTCA
3s-Let7f2-m-si	CTAGTGAGGTAGTAAATTGTATAGTT
Oligo for rmutagenesis
5-let7f2G-A	GGGATGAGGTAGTAAATTGTATAGTTTTAG
3-let7f2G-A	CTAAAACTATACAATTTACTACCTCATCCC
5x-let7f-mi	tcgaGGGTATACGGTCTACTACCTCA
3S-let7f-mi	ctagTGAGGTAGTAGACCGTATACCC
5x-let7f-m-mi	tcgaGGGTATACGGTTTACTACCTCA
3S-let7f-m-mi	ctagTGAGGTAGTAAACCGTATACCC
let7f2 probe	AACTATACAATCTACTACCTCA
hsa-mir-18b
5Xho-miR18b	tatCTCGAGCTACTGAGAACTGTAGTTTGTGCA
3BamH-miR18b	tatGGATCCACTGAAATGTGTCCTATTCAAATT
5x-18b-si	tcgaCTAACTGCACTAGATGCACCTTA
3s-18b-si	ctagTAAGGTGCATCTAGTGCAGTTAG
5x-18b-mi	tcgagaAACTGCACatcATGCACCTTA
3s-18b-mi	ctagTAAGGTGCATGATGTGCAGTTTC
5x-18bStar-si	tcgaGCCAGAAGGGGCATTTAGGGCA
3s-18bStar-si	ctagTGCCCTAAATGCCCCTTCTGGC
5x-18bStar-mi	tcgacgCAGAAGGccgATTTAGGGCA
3s-18bStar-mi	ctagTGCCCTAAATCGGCCTTCTGCG
hsa-mir-505
5Xho-miR505	tatCTCGAGCATACTGTCATTGAAAGCACTTAC
3BamH-miR505	tatGGATCCTGAGCAAATGAATGGGAGCAGTAA
5x-505-si	tcgaAGGAAACCAGCAAGTGTTGACG
3s-505-si	ctagCGTCAACACTTGCTGGTTTCCT
5x-505-mi	tcgatcGAAACCAcgtAGTGTTGACG
3s-505-mi	ctagCGTCAACACTACGTGGTTTCGA
5x-505Star-si	tcgaACATCAATACTTCCTGGCTCCC
3s-505Star-si	ctagGGGAGCCAGGAAGTATTGATGT
5x-505Star-mi	tcgatgATCAATAgaaCCTGGCTCCC
3s-505STar-mi	ctagGGGAGCCAGGTTCTATTGATCA
hsa-mir-502
5Xho-miR502	tatCTCGAGAATATGTGTAGGAGACTTG
3BamH-miR502	tatGGATCCTGTCTCACTCTGGATACCTG
5x-502-5p-si	tcgaTAGCACCCAGATAGCAAGGAT
3s-502-5p-si	ctagATCCTTGCTATCTGGGTGCTA
5x-502-5p-mi	tcgaatGCACCCtctTAGCAAGGAT
3s-502-5p-mi	ctagATCCTTGCTAAGAGGGTGCAT
5x-502-3p-si	tcgaTGAATCCTTGCCCAGGTGCATT
3s-502-3p-si	ctagAATGCACCTGGGCAAGGATTCA
5x-502-3p-mi	tcgaacAATCCTTcggCAGGTGCATT
3s-502-3p-mi	ctagAATGCACCTGCCGAAGGATTGT
miR-502-5p probe	TAGCACCCAGATAGCAAGGAT
miR-502-3p probe	AATCCTTGCCCAGGTGCATTGCATT
hsa-mir-188
5Xho-miR188	tatCTCGAGCTGCCCACTTGCACCCCCCAGGCC
3BamH-miR188	tatGGATCCCACCACATGGGTGTGTGTTTTTCT
5x-188-5p-si	tcgaCCCTCCACCATGCAAGGGATG
3s-188-5p-si	ctagCATCCCTTGCATGGTGGAGGG
5x-188-5p-mi	tcgaggCTCCACgtaGCAAGGGATG
3s-188-5p-mi	ctagCATCCCTTGCTACGTGGAGCC
5x-188-3p-si	tcgaTGCAAACCCTGCATGTGGGAG
3s-188-3p-si	ctagCTCCCACATGCAGGGTTTGCA
5x-188-3p-mi	tcgaacCAAACCgacCATGTGGGAG
3s-188-3p-mi	ctagCTCCCACATGGTCGGTTTGGT
5x-188-3pm-si	tcgaTGCAAACCCTGCATATGGGAG
3s-188-3pm-si	ctagCTCCCATATGCAGGGTTTGCA
5x-188-3pm-mi	tcgaacCAAACCgacCATATGGGAG
3s-188-3pm-mi	ctagCTCCCATATGGTCGGTTTGGT
hsa-mir-325
5Xho-miR325	tatCTCGAGGTTCTGTGAGAAAAAGTTGCTTAA
3BamH-miR-325	tatGGATCCTAACCACCACTAGGCCTAAGTACC
Oligo for mutagensis
5-miR325-mut	CATAATTTGTTTATTaAGGACCTCCTATCAA
3-miR325-mut	TTGATAGGAGGTCCTTAATAAACAAATTATG
5Xho-miR325-L	tatCTCGAgacagggattgtatggctta
3BamH-miR-325-L	tatGGATcctcaacacactgaaatctg
5Xho-miR325-s	tatCTCGAGATTCAAGTCCACAGAACCA
3BamH-miR-325-s	tatGGATccTCAAAATGTAGGATGTTG
5x-325-5p-siL	tcgaACAAACACTTACTGGACACCTACTAGGAA
3s-325-5p-siL	ctagTTCCTAGTAGGTGTCCAGTAAGTGTTTGT
5x-325-3p-siL	tcgaTTGATAGGAGGTCCTCAATAAACAAATT
3s-325-3p-siL	ctagAATTTGTTTATTGAGGACCTCCTATCAA
5x-325-si	tcgaACACTTACTGGACACCTACTAGG
3s-325-si	ctagCCTAGTAGGTGTCCAGTAAGTGT
5x-325-mi	tcgatgACTTACTGctgACCTACTAGG
3s-325-mi	ctagCCTAGTAGGTCAGCAGTAAGTCA
hsa-mir-510
5Xho-miR510	tatCTCGagtcctgaaaactGCCA
3BamH-miR510	tatGGATCCTTGCAAGTTTGTAAAGAAGG
miR-510-5p probe	GTGATTGCCACTCTCCTGAGTA
miR-510-3p (star) probe	CCACTCTTAGAGGTTTCAATCA
5x-510Star-si	tcgaCCACTCTTAGAGGTTTCAATCA
3s-510Star-si	ctagTGATTGAAACCTCTAAGAGTGG
5x-510Star-mi	tcgaggACTCTTActcGTTTCAATCA
3s-510Star-mi	ctagTGATTGAAACgagTAAGAGTcc
5x-510Star-m-si	tcgaCCACTCTTAGAGGTTTCAgTCA
3s-510Star-m-si	ctagTGAcTGAAACCTCTAAGAGTGG
5x-510Star-m-mi	tcgaggACTCTTActcGTTTCAgTCA
3s-510Star-m-mi	ctagTGAcTGAAACgagTAAGAGTcc
5x-510-si	tcgaGTGATTGCCACTCTCCTGAGTA
3s-510-si	ctagTACTCAGGAGAGTGGCAATCAC
5x-510-mi	tcgacaGATTGCCtgaCTCCTGAGTA
3s-510-mi	ctagTACTCAGGAGTCAGGCAATCTG
hsa-mir-660
5Xho-660	tatCTCGAgcactgcttctccaggcgtg
3Bam-660	tatGGATCCTGGGGAAGTCTAGGCACC
S660-5p-si	tcgaCAACTCCGATATGCAATGGGTA
N660-5p-si	ggccTACCCATTGCATATCGGAGTTG
S660-5p-si-m	tcgaCAACTCCAATATGCAATGGGTA
N660-5p-si-m	ggccTACCCATTGCATATTGGAGTTG
S660-3p-si	tcgaCCTCCTGTAATCCATGCACACAGGAGGTG
N660-3p-si	ggccCACCTCCTGTGTGCATGGATTACAGGAGG
S660-5p-mi	tcgaGTACTCCGAGTCGCAATGGGTA
N660-5p-mi	ggccTACCCATTGCgacTCGGAGTac
660-5p probe	CAACTCCGATATGCAATGGGTA
hsa-miR-509-3
5Xho-509-2	tatCTCgagtggacaggactcaaagc
3Bam-509-2	tatGGATCCACGTGTCTGGTGGTCAGGC
S509-5p-si	tcgaTGATTGCCACTGTCTGCAGTA
N509-5p-si	ggccTACTGCAGACAGTGGCAATCA
S509-3p-si	tcgaCTACCCACAGACGTACCAATCA
N509-3p-si	ggccTGATTGGTACGTCTGTGGGTAG
5Xho-509-3	tatCTCGAGtgggagtggacagcactcaa
3Bam-509-3	tatGGATCCAAATTCCTAGACCATGTGTC
5S-509-3-5p-si	tcgaCATGATTGCCACGTCTGCAGTA
3N-509-3-5p-si	ggccTACTGCAGACGTGGCAATCATG
5S-509-3CT-3p-si	tcgaCTACCCACAAACGTACCAATCA
3N-509-3CT-3p-si	ggccTGATTGGTACGTTTGTGGGTAG
5S-509-3CG-5p-si	tcgaCATCATTGCCACGTCTGCAGTA
3N-509-3CG-5p-si	ggccTACTGCAGACGTGGCAATGATG
S509-3-5p-mi	tcgaGTTGATTGCGTGGTCTGCAGTA
N509-3-5p-mi	ggccTACTGCAGACcacGCAATCAac
U2A probe	AGAACAGATACTACACTTGA
S1-27 mer siRNA
Sense	GCGGAGACAGCGACGAAGAGCUCAUCA
Antisense	UGAUGAGCUCUUCGUCGCUGUCUCCGC
Probe ( Detect antisense)	GCGGAGACAGCGACGAAGAGCTCATCA
